1 **Carbapenem-Resistant *Acinetobacter baumannii* in US hospitals: diversification of**  
2 **circulating lineages and antimicrobial resistance**

3

4 Alina Iovleva,<sup>1</sup> Mustapha M. Mustapha,<sup>1</sup> Marissa P. Griffith,<sup>1</sup> Lauren Komarow,<sup>2</sup> Courtney  
5 Luterbach,<sup>3</sup> Daniel R Evans,<sup>1,4</sup> Eric Cober,<sup>5</sup> Sandra S. Richter,<sup>6</sup> Kirsten Rydell,<sup>7</sup> Cesar A.  
6 Arias,<sup>7,8</sup> Jesse T. Jacob,<sup>9</sup> Robert A. Salata,<sup>10</sup> Michael J. Satlin,<sup>11</sup> Darren Wong,<sup>12</sup> Robert A.  
7 Bonomo,<sup>13,14,15,16</sup> David van Duin,<sup>17</sup> Vaughn S. Cooper,<sup>18</sup> Daria Van Tyne,<sup>1</sup> Yohei Doi<sup>1,19</sup>

8

9 1 Division of Infectious Diseases, University of Pittsburgh School of Medicine, Pittsburgh, PA,  
10 USA

11 2 The Biostatistics Center, The George Washington University, Rockville, MD, USA

12 3 Division of Pharmacotherapy and Experimental Therapeutics, University of North Carolina  
13 Chapel Hill, NC, USA

14 4 Department of Infectious Diseases and Microbiology, University of Pittsburgh Graduate  
15 School of Public Health, Pittsburgh, PA, US

16 5 Department of Infectious Diseases, Cleveland Clinic, Cleveland, OH, USA

17 6 Department of Laboratory Medicine and Pathology, Mayo Clinic, Jacksonville, FL, US

18 7 Division of Infectious Diseases, Center for Antimicrobial Resistance and Microbial Genomics,  
19 (CARMiG), UTHealth McGovern Medical School, Houston, Texas, USA

20 8 Center for Infectious Diseases, UTHealth School of Public Health, Houston, Texas, USA

21 9 Division of Infectious Diseases, Department of Medicine, Emory University School of  
22 Medicine, Atlanta, GA, USA

23 10 Division of Infectious Diseases and HIV Medicine, Department of Medicine, Case Western

24 Reserve University School of Medicine, Cleveland, Ohio, USA

25 11 Division of Infectious Diseases, Department of Medicine, Weill Cornell Medicine, New

26 York, NY, USA

27 12 Division of Infectious Diseases, Keck School of Medicine of the University of Southern

28 California, Los Angeles, CA, USA

29 13 Research Service, Louis Stokes Cleveland Department of Veterans Affairs Medical Center,

30 Cleveland, Ohio, USA

31 14 Division of Infectious Diseases and HIV Medicine, Department of Medicine, Case Western

32 Reserve University School of Medicine, Cleveland, Ohio, USA

33 15 Department of Molecular Biology and Microbiology, Case Western Reserve University

34 School of Medicine, Cleveland, Ohio, USA

35 16 Department of Pharmacology, Case Western Reserve University School of Medicine,

36 Cleveland, Ohio, USA

37 17 Division of Infectious Diseases, University of North Carolina Chapel Hill, NC, USA

38 18 Department of Microbiology and Molecular Genetics, University of Pittsburgh School of

39 Medicine, Pittsburgh, PA

40 19 Departments of Microbiology and Infectious Diseases, Fujita Health University School of

41 Medicine, Aichi, Japan

42

43

44 **Abstract**

45 Carbapenem-resistant *Acinetobacter baumannii* (CRAb) are a major cause of healthcare-  
46 associated infections. CRAb are typically multidrug-resistant and infection is difficult to treat.  
47 Despite the urgent threat that CRAb pose, few systematic studies of CRAb clinical and molecular  
48 epidemiology have been conducted. The Study Network of *Acinetobacter* as a Carbapenem-  
49 Resistant Pathogen (SNAP) is designed to investigate the clinical characteristics and  
50 contemporary population structure of CRAb circulating in US hospital systems using whole  
51 genome sequencing (WGS). Analysis of the initial 120 SNAP patients from four US centers  
52 revealed that CRAb remain a significant threat to hospitalized patients, affecting the most  
53 vulnerable patients and resulting in 24% all-cause 30-day mortality. The majority of currently  
54 circulating isolates belonged to ST2<sup>Pas</sup>, a part of Clonal Complex 2 (CC2), which is the dominant  
55 drug-resistant lineage in the United States and Europe. We identified three distinct sub-lineages  
56 within CC2, which differed in their antibiotic resistance phenotypes and geographic distribution.  
57 Most concerning, colistin resistance (38%) and cefiderocol (10%) resistance were common  
58 within CC2 sub-lineage C (CC2C), where the majority of isolates belonged to ST2<sup>Pas</sup>/ST281<sup>Ox</sup>.  
59 Additionally, we identified a newly emergent lineage, ST499<sup>Pas</sup> that was the most common non-  
60 CC2 lineage in our study and had a more favorable drug susceptibility profile compared to CC2.  
61 Our findings suggest a shift within the CRAb population in the US during the past 10 years, and  
62 emphasize the importance of real-time surveillance and molecular epidemiology in studying  
63 CRAb dissemination and clinical impact.

64 **Importance** Carbapenem-resistant *Acinetobacter baumannii* (CRAb) constitute a major threat to  
65 public health. To elucidate the molecular and clinical epidemiology of CRAb in the US, clinical  
66 CRAb isolates were collected along with data on patient characteristics and outcomes and

67 bacterial isolates underwent whole genome sequencing and antibiotic susceptibility phenotyping.

68 Key findings included emergence of new sub-lineages within the globally predominant clonal

69 complex (CC) 2, increased colistin and ceftiderocol resistance within one of the CC2 sub-

70 lineages, and the emergence of ST499<sup>Pas</sup> as a previously unrecognized CRAB lineage in US

71 hospitals.

72

73

## 74 **Introduction**

75 Carbapenem-resistant *Acinetobacter baumannii* (CRAb) constitute a major threat to public  
76 health. CRAb are extensively resistant to multiple antimicrobial agents, often spread among  
77 hospitalized patients, and cause difficult-to-treat infections associated with high mortality (1).  
78 The World Health Organization (WHO) and the Centers for Disease Control and Prevention  
79 (CDC) have designated CRAb a “priority pathogen” based on the lack of effective treatment  
80 options, and have pointed to an urgent need for additional research (2-4). Prior studies have  
81 shown that several genetically distinct clonal *A. baumannii* lineages/groups are currently  
82 circulating around the world, with the three most prevalent global lineages referred to as Clonal  
83 Complex (CC) 1, CC2, and CC3. These designations are reflected in the multi-locus sequence  
84 types of each lineage (ST1, ST2, and ST3, respectively) as defined by the commonly used  
85 Pasteur Institute scheme. ST2<sup>Pas</sup> is the most common CC2 lineage in the US, and other CC2 and  
86 non-CC2 lineages are found less commonly (5, 6). Our previous analysis at a single health  
87 system in Pennsylvania found substantial genetic diversity within extensively drug-resistant  
88 ST2<sup>Pas</sup> *A. baumannii*, which could be grouped into multiple distinct sub-lineages by MLST and  
89 WGS analysis (7). Despite being a major public health concern, our current understanding of the  
90 CRAb lineages and sub-lineages circulating in the United States is limited. Systematic studies of  
91 CRAb are of paramount importance in devising strategies to prevent their dissemination and  
92 improve clinical outcomes.

93         The Study Network of *Acinetobacter* as a Carbapenem-Resistant Pathogen (SNAP) is a  
94 prospective, observational, multicenter clinical study that is designed to elucidate the clinical  
95 characteristics, treatment outcomes, and contemporary genomic epidemiology of CRAb through  
96 consecutive enrollment of hospitalized patients with clinical cultures positive for CRAb at

97 multiple health systems throughout the US. In this analysis, we describe the results from this  
98 effort, comprising 120 unique patients and 150 CRAB isolates collected during the first year of  
99 the study from four health systems in the US, with a focus on patient characteristics, bacterial  
100 population structure and antibiotic resistance profiles.

101

## 102 **Methods**

### 103 **Patients.**

104 Patients were included in the study if CRAB were isolated in a clinical culture from any anatomic  
105 site during hospitalization between September 2017 and October 2018. Carbapenem resistance  
106 was determined based on the Clinical and Laboratory Standards Institute (CLSI) interpretive  
107 criteria for meropenem or imipenem non-susceptibility (minimum inhibitory concentration  
108 [MIC],  $\geq 4$  mg/L). A total of twenty-three hospitals in four quaternary health systems (Cleveland  
109 Clinic Foundation, University of Pittsburgh Medical Center, University of Texas Health Science  
110 Center at Houston, and University of North Carolina Chapel Hill) enrolled patients in study  
111 phase. The study was approved by the Institutional Review Boards (IRB) of all the health  
112 systems with a waiver of patient consent.

### 113 **Clinical information.**

114 Clinical data based on electronic health record collected included patient demographics,  
115 underlying comorbidities (Charlson comorbidity index [CCI]), the severity of illness as defined  
116 by the Pitt bacteremia score, microbiology reports, resolution of infection symptoms, duration of  
117 hospital stay, disposition after discharge, readmission at 90 days, mortality at 30 and 90 days,  
118 and infection versus colonization status (8, 9). Infection and colonization were defined by  
119 previously described criteria, with the exception of respiratory infections, as patients with CRAB

120 respiratory infections do not necessarily meet the criteria outlined by the American Thoracic  
121 Society and the Infectious Diseases Society of America (10-12). Respiratory isolates were  
122 considered to be causing an infection if the respiratory diagnosis on the case report form was  
123 tracheobronchitis, pneumonia without mechanical ventilation, ventilator-associated pneumonia,  
124 or an “other” diagnosis after review by two study investigators. All other cultures, including  
125 those missing information needed for the assignment of infection/colonization, were considered  
126 to represent colonization. The desirability of outcome ranking (DOOR) analysis was used to  
127 assess the following deleterious and adverse events: 1) absence of clinical and symptomatic  
128 response or relapse of infection; 2) unsuccessful discharge, which included death, discharge to  
129 hospice, hospitalization >30 days and readmission; 3) new-onset renal failure within 30 days  
130 after the index culture; and 4) *Clostridioides difficile* infection within 30 days after index culture,  
131 as described previously (10).

### 132 **Microbiology.**

133 Bacterial identification and susceptibility testing were performed by each contributing  
134 microbiology laboratory using Biotyper (Bruker, Billerica, MA, USA), MicroScan (Beckman  
135 Coulter, Atlanta, GA, USA) or VitekMS, Vitek2, Etest (all bioMérieux, Durham, NC, USA), BD  
136 Phoenix, BBL disks (both BD, Durham, NC, USA), Sensititre (Thermo Fisher, Waltham, MA,  
137 USA), disk diffusion or in-house agar dilution.

138 At the central research laboratory, MICs of each agent active against *A. baumannii* (amikacin,  
139 gentamicin, tobramycin, doxycycline, minocycline, tigecycline, ciprofloxacin, levofloxacin,  
140 trimethoprim-sulfamethoxazole, imipenem, meropenem, doripenem, cefepime, ceftazidime,  
141 ampicillin-sulbactam, and colistin) were determined using Sensititre™ GNX3F plates (Thermo  
142 Fisher Scientific, Waltham, MA). CLSI breakpoints were used to determine susceptibility.

143 Cefiderocol susceptibility testing was performed using an iron-depleted, cation-adjusted Mueller-  
144 Hinton broth microdilution panel (International Health Management Associates, Schaumburg,  
145 IL, USA). Cefiderocol MIC results were interpreted using investigational breakpoints with MIC  
146  $\leq 4$   $\mu\text{g/ml}$  considered susceptible and MIC  $>4$   $\mu\text{g/ml}$  as non-susceptible. As CLSI breakpoints  
147 are not available for tigecycline, we defined susceptibility as MIC  $\leq 2$   $\mu\text{g/ml}$ , and non-  
148 susceptibility as MIC  $\geq 4$   $\mu\text{g/ml}$ , based on previous literature (13).

#### 149 **Whole genome sequencing and phylogenetic analysis.**

150 Genomic DNA was extracted from isolates using a DNeasy Blood & Tissue Kit (Qiagen,  
151 Germantown, MD). Whole genome sequencing was performed on a NextSeq 550 instrument  
152 (Illumina, San Diego, CA), using 2x150-bp paired-end reads at the Microbial Genome  
153 Sequencing Center (Pittsburgh, PA). Additionally, five isolates representing major sub-lineages  
154 were sequenced with long-read technology on an Oxford Nanopore MinION device (Oxford  
155 Nanopore Technologies, Oxford, United Kingdom). Resulting reads were quality processed  
156 through our bioinformatics pipeline. Five isolates were excluded from further molecular and  
157 antimicrobial susceptibility analysis as they were identified as bacterial species other than *A.*  
158 *baumannii* (4 isolates) or were carbapenem-susceptible *A. baumannii* (1 isolate). Details of  
159 sequencing, bioinformatics, and phylogenetic analyses are available in the Supplementary  
160 Materials.

#### 161 **Nucleotide sequence accession numbers.**

162 Raw sequence reads and draft genome assemblies have been deposited in the NCBI database  
163 under BioProject PRJNA667103, under accession numbers SAMN16351076 - SAMN16351208.

164

## 165 **RESULTS**



166 **Patients and clinical epidemiology.**

167 120 unique patients admitted to four health systems in the US in 2017-2018 were enrolled in the  
168 first phase of the SNAP cohort (Table 1). In this cohort, 135 admissions were recorded, and 155  
169 clinical cultures yielded *CRAB* (1-5 isolates per patient). Clinical data were available from all  
170 120 patients. The enrollments were from Cleveland (55%), Pittsburgh (23%), Houston (20%),  
171 and Chapel Hill (3%). Median patient age was 61. 60% were male. Most patients had comorbid  
172 conditions, with a median Charlson comorbidity score of 3, and 48% were critically ill (Pitt  
173 bacteremia score  $\geq 4$ ) at the time of initial *CRAB* isolation (8). More than half of patients were  
174 admitted from long-term care settings, with 41% admitted from long-term care facilities and 11%  
175 from long-term acute care hospitals. All-cause mortality rates at 30 and 90 days from the date of  
176 index culture collection were 24% and 27%, respectively. 30- and 90-day mortality in those  
177 deemed to have infection was 26%. Readmission within 90 days occurred in 54% of cases. Using  
178 DOOR outcomes at 30 days after index culture, 44% were alive without events, 19% were alive  
179 with one event, 13% were alive with two or three events.

180       Among the 120 enrolled patients, the respiratory tract was the predominant anatomic  
181 source of the first available *CRAB* isolate (47%), followed by wound (36%) (Table 1). 59% of  
182 isolates from respiratory source were associated with infection, while 46% of isolates from  
183 wound cultures and 33% from urine cultures met the definition of infection.

184 **Molecular epidemiology and bacterial population structure.**

185 To understand the population structure and distribution of *CRAB* in the US, phylogenetic  
186 analyses and multi-locus sequence type (MLST) identification were performed on the first  
187 available isolate from each patient.

188 A whole genome phylogeny showed a diverse population structure (Figure 1). We defined single  
189 nucleotide polymorphism (SNP) thresholds that clustered study isolates into clearly defined  
190 clonal lineages and sub-lineages and correlated them with established Pasteur (<sup>Pas</sup>) and Oxford  
191 (<sup>Ox</sup>) MLST schemes. A cut-off of 10,000 SNPs differentiated *CRAb* lineages belonging to  
192 different Pasteur ST types and CCs. A cut-off of 2,000 SNPs further defined major sub-lineages  
193 within the Pasteur STs which largely correlated with Oxford STs. The 115 available isolates  
194 belonged to 10 different Pasteur sequence types (STs), including 2 novel STs first reported by  
195 this study (ST1562<sup>Pas</sup> and ST1563<sup>Pas</sup>). The majority of isolates (77%) belonged to ST2<sup>Pas</sup> or CC2,  
196 the dominant antibiotic-resistant lineage that has circulated in the US and Europe (5). Three sub-  
197 lineages within CC2 with varying degrees of heterogeneity were apparent (Figure 1, Table S1).  
198 CC2 sub-lineage A (CC2A) comprised multiple Oxford STs, including ST208<sup>Ox</sup>, ST218<sup>Ox</sup> and  
199 ST417<sup>Ox</sup> (Tables S1, S2). CC2 sub-lineages B (CC2B) and C (CC2C) corresponded to ST451<sup>Ox</sup>  
200 and its single locus variants (SLVs), and ST281<sup>Ox</sup> and its SLVs, respectively (Table S2).

201 Of the remaining non-CC2 isolates, most belonged to ST499<sup>Pas</sup> (16%), which has been  
202 infrequently observed in the past. The non-CC2 ST499<sup>Pas</sup> lineage could be further separated into  
203 two sub-lineages, D and E (containing 17 and 3 isolates respectively), with both sub-lineages  
204 corresponding to the same Oxford ST (ST345<sup>Ox</sup>). The remaining isolates belonged to 7  
205 additional STs and contained one or two isolates each.

206 The sub-lineage that was previously widely distributed in the US, corresponding to  
207 ST208<sup>Ox</sup> and here called sub-lineage CC2A, comprised a minority of the isolates in our study,  
208 and was found only in Cleveland and Houston (Table 2). Isolates belonging to sub-lineage CC2B  
209 (ST451<sup>Ox</sup> and its SLVs) were predominantly found in Pittsburgh, but were also detected in  
210 Cleveland and Chapel Hill. Sub-lineage CC2C (ST281<sup>Ox</sup> and SLVs) was found at all four study

211 centers and was the dominant lineage in Cleveland and Pittsburgh. ST499<sup>Pas</sup> lineage D isolates  
212 were identified in Cleveland and Houston, while lineage E isolates were only found in Houston  
213 (Table 2). At the level of individual hospitals, some clinical sites had a single dominant lineage,  
214 while others had several dominant lineages. The distributions of CRAb sub-lineages from  
215 different body sites were similar to one other, with the exception that no CC2A isolates were  
216 found in blood and no CC2B isolates were found in wound cultures (Table 3).

### 217 **Antibiotic susceptibility of CRAb isolates.**

218 We performed MIC testing on the 115 unique patient isolates for agents that possess activity  
219 against *A. baumannii*. Of the 115 isolates tested, 36% were resistant to amikacin and 57% were  
220 resistant to gentamicin (Figure 2, Table S3). Rates of tigecycline and minocycline resistance  
221 were low at 2% and 4%, respectively, whereas 37% of isolates were resistant to cefepime, and  
222 79% were resistant to ceftazidime. Seven isolates (6%) were resistant to ceftiderocol using CLSI  
223 criteria (MIC,  $\geq 16$ ). Only one additional isolate met resistance criteria when we applied FDA  
224 breakpoints (I= 2, R $\geq 4$ ). However, ten isolates (10%) were now considered to have intermediate  
225 susceptibility with MIC of 2. Finally, 22% of isolates in our study were resistant to colistin, the  
226 last resort antibiotic for treating CRAb infections. Due to the recent change of colistin  
227 breakpoints by CLSI, the remaining isolates were intermediate to colistin, eliminating  
228 susceptible category and moving susceptible to intermediate. When we assessed antibiotic  
229 susceptibility rates by bacterial sub-lineage, a few notable differences emerged. Sub-lineage  
230 CC2B had the highest rates of aminoglycoside and cefepime non-susceptibility rates. ST499<sup>Pas</sup>  
231 (D and E) isolates, on the other hand, had comparatively low rates of non-susceptibility to  
232 ceftazidime and cefepime. All except two colistin-resistant isolates belonged to sub-lineage  
233 CC2C, resulting in 38% resistance within this sub-lineage. Study sites differed somewhat in the

234 proportion of colistin-resistant CC2C isolates: 38% in Cleveland, 33% in Pittsburgh, and 50% in  
235 Houston. Most cefiderocol non-susceptible isolates belonged to sub-lineage CC2C as well, and  
236 one isolate was resistant to both cefiderocol and colistin. Cefiderocol non-susceptibility within  
237 CC2C lineage increased from 6% to 23% when FDA breakpoints were applied.

### 238 **Plasmids and resistance islands.**

239 One of the reasons for the success of *CRAb* as a nosocomial pathogen is its ability to acquire  
240 drug resistance genes through horizontal transfer. In addition to the ability to acquire plasmids,  
241 *CRAb* isolates are also known to possess composite transposons and integrons containing  
242 resistance genes at chromosomal locations, referred to as resistance islands (RIs) (14, 15).

243 To determine plasmid diversity within clinical *CRAb* isolates, six unique plasmids were  
244 resolved from available high-quality, closed genomes from isolates belonging to CC2A (S1),  
245 CC2B (ARLG-6376), CC2C (ARLG-6295, ARLG-6344), ST499<sup>Pas</sup> D (ARLG-6420) and  
246 ST499<sup>Pas</sup> E (ARLG-6418). Six unique plasmids were resolved (Table S4). Plasmids varied in size  
247 from 11 kb to 167 kb and belonged to five different homology groups based on *rep* gene  
248 sequences. Three of the plasmids carried OXA-type carbapenemase genes (*bla*<sub>OXA-23</sub> in  
249 pARLG6295\_2 and pARLG6344\_2; *bla*<sub>OXA-207</sub> in pARLG6420\_2). pARLG\_6295\_2 additionally  
250 encoded the *aphA6* gene conferring amikacin resistance. The remaining two plasmids did not  
251 possess known antimicrobial resistance genes.

252 Next, we evaluated the presence of identified plasmids among all initial *CRAb* isolates in  
253 our study (Figure 3). Overall, CC2 isolates carried significantly more plasmids than non-CC2  
254 isolates ( $p < 0.0001$ , Mann-Whitney test). Within CC2, different lineages had differences in  
255 plasmid content, with most CC2B isolates containing pARLG6344\_3, while CC2C tended to  
256 harbor the *bla*<sub>OXA-23</sub>-carrying plasmids pARLG6344\_2 and pARLG6295\_4. CC2C isolates that

257 did not contain pARLG-6344\_2 had either the *bla*<sub>OXA-23</sub> and *aphA6*-encoding pARLG6295\_2  
258 plasmid, or no detectable carbapenemase gene-carrying plasmids. The majority of ST499<sup>Pas</sup>  
259 isolates lacked plasmids, with the exception of 3 isolates carrying *bla*<sub>OXA-207</sub> on pARLG6420\_2.  
260 To account for additional plasmids, we examined sequences for the presence of plasmid *rep*  
261 genes (14). Overall, plasmid *rep* genes belonging to eight groups were identified among all  
262 initial CRAB isolates. Plasmid *rep* gene content was also higher in CC2 versus other lineages ( $p$   
263  $<0.0001$ , Mann-Whitney test).

264 We then surveyed the isolates for the presence of previously described RIs, including  
265 AbGRI1, AbGRI2, AbGRI3, and AbGRI4 (Figure 3) (16). Most CC2A and CC2B isolates, along  
266 with some ST499<sup>Pas</sup> isolates, possessed an AbGRI1-like island, which typically carries *strA-strB*  
267 (streptomycin resistance), *tetA(B)* (tetracycline resistance), and *bla*<sub>OXA-23</sub> genes. Most CC2B and  
268 several CC2A isolates belonging to ST2<sup>Pas</sup>/ST208<sup>Ox</sup> also contained an AbGRI3-like RI carrying  
269 *aacA4* (gentamicin/tobramycin resistance), *catB8* (chloramphenicol resistance), *aadA1*  
270 (streptomycin resistance), and *armA* (gentamicin, kanamycin, amikacin, tobramycin, and  
271 plazomicin resistance). CC2C isolates almost exclusively contained the recently described  
272 AbGRI4 island containing *aadB* (tobramycin resistance), *aadA2* (streptomycin and  
273 spectinomycin resistance), and *sulI* (sulfonamide resistance) genes. A small group of CC2C  
274 isolates lacked AbGRI4 and contained either an AbGRI2-like RI, which typically carried *aacCI*  
275 (gentamicin resistance), *aadA1* (streptomycin resistance), and *sulI* (sulfonamide resistance), or  
276 no RIs at all.

277 Additionally, we identified a RI that was exclusively present in ST499<sup>Pas</sup> and ST79<sup>Pas</sup>  
278 isolates within our dataset. This RI (ARLG-6420 RI) was 19.5-kb long and was integrated at the  
279 *tRNA-Ser* site. It possessed 99.8% sequence identity with Tn6250, which was previously

280 described in strain LAC-4, an ST10<sup>Pas</sup> CRAB that was associated with an outbreak in Los  
281 Angeles County, CA (Figure 4) (17, 18). Overall, these findings suggest that both plasmids and  
282 resistance islands are abundant among CRAB isolates, and they encode clinically relevant  
283 antimicrobial resistance genes that likely contribute to the persistence of CRAB in clinical  
284 settings.

### 285 **Carbapenem resistance mechanisms.**

286 We catalogued all genomes for carbapenemase genes that would explain their CRAB phenotype.  
287 The most frequent acquired carbapenemase gene detected was *bla*<sub>OXA-23</sub>, which was present in  
288 69% of isolates (Figure 3). Other acquired *bla*<sub>OXA</sub> carbapenemase genes were identified less  
289 frequently and included *bla*<sub>OXA-24/40</sub>; *bla*<sub>OXA-72</sub> and *bla*<sub>OXA-207</sub> (encoding single amino acid  
290 variants of OXA-24/40); and *bla*<sub>OXA-237</sub> (encoding a recently characterized OXA-235-like  
291 carbapenemase) (19-21). Fourteen isolates belonging to different sub-lineages, primarily CC2A  
292 and CC2C, did not encode known acquired carbapenemase genes, despite being resistant to  
293 carbapenems. Of these 14 isolates, 8 isolates possessed an insertion of *ISAbal*, an insertion  
294 sequence carrying strong promoter activity upstream of the intrinsic carbapenemase gene *bla*<sub>OXA-</sub>  
295 <sub>82</sub>, whose product shows weak carbapenemase activity at baseline expression. The same *ISAbal*  
296 insertion upstream of *bla*<sub>OXA-82</sub> was previously reported to result in carbapenem resistance in *A.*  
297 *baumannii* (22). Another 4 isolates possessed *ISAbal* insertions upstream of other chromosomal  
298 β-lactamase/carbapenemase genes, including *bla*<sub>OXA-172</sub>, *bla*<sub>OXA-113</sub> and *bla*<sub>OXA-916</sub>.

### 299 **Colistin resistance in CC2C.**

300 Given the surprisingly high rate of colistin resistance in sub-lineage CC2C isolates, we explored  
301 possible mechanisms of colistin resistance within this sub-lineage. None of the isolates contained  
302 *mcr* gene family sequences encoding acquired colistin resistance determinants (23). Additionally,

303 we examined the sequence of the *pmrCAB* operon, which is responsible for lipopolysaccharide  
304 (LPS) modifications leading to colistin resistance, as well as the *lpxA*, *lpxC*, and *lpxD* genes,  
305 which are involved in LPS synthesis and whose disruption can result in colistin resistance (24,  
306 25). We found that *pmrA*, *lpxA*, and *lpxC* had identical nucleotide sequences among both  
307 colistin-intermediate and colistin-resistant isolates. Non- synonymous *pmrB* mutations were  
308 present in 30% of colistin isolates (L9P, I25F, M145K, F155V, E185K, F387Y, and N353S). We  
309 also identified a D95E substitution in *lpxD* in one isolate. The contribution of *pmrC* and *eptA*  
310 sequence variation could not be evaluated. For 65% of the isolates, we could not identify a  
311 mechanism of colistin resistance based on the analysis of candidate resistance-associated genes.

### 312 **Frequency of recombination events.**

313 An important question in bacterial population genetics is the extent to which recombination  
314 contributes to or constrains lineage diversity. We used ClonalFrameML to analyze all 150  
315 available *CRAb* genomes (Figure 5A-B) and discovered an overall recombination rate of 64  
316 recombination events for every 100 point mutations. Within CC2 and ST499<sup>Pas</sup>, the rates were 43  
317 and 49 per 100 point mutations, respectively. Major recombination hotspots within CC2 occurred  
318 in probable prophage regions and in the capsular polysaccharide locus (Figure 5A). Several other  
319 long putative recombination events distinguished different sub-lineages and Oxford STs within  
320 CC2 and affected predicted capsular polysaccharide loci and surrounding genes, including *gpi*,  
321 which is one of the genes involved in defining Oxford ST (Figure 5A) (26). Similarly, within  
322 ST499<sup>Pas</sup>, larger recombination hotspots occurred in predicted prophage regions, as well as in  
323 other putative mobile genomic elements (MGEs), including the Tn6250-like genomic island  
324 described above. However, recombination events were spread out throughout the genome,  
325 largely sparing the CPS locus in this clade (Figure 5B). Finally, removal of recombinant SNPs

326 decreased the number of SNPs in the core genomes and merged the CC2A and CC2B sub-  
327 lineages and the ST499<sup>Pas</sup> D and ST499<sup>Pas</sup> E lineages (Supplementary Tables 6 and 7). These  
328 data demonstrate high rates of recombination within *CRAB* populations that led to differentiation  
329 of *CRAB* sub-lineages both within CC2 and ST499<sup>Pas</sup>.

### 330 **Intra- and inter-patient genetic diversity.**

331 We next assessed the genetic diversity of the *CRAB* isolates within and between patients. Of the  
332 24 patients with more than one isolate from different culture dates, 22 yielded *CRAB* isolates  
333 belonging to the same Oxford ST. The two remaining patients had *CRAB* isolates belonging to  
334 two distinct Oxford STs, suggesting that most patients with multiple isolates were colonized or  
335 infected with the same bacterial strain over time, rather than multiple genetically unrelated  
336 strains.

337 Overall, isolates belonging to the same sub-lineage derived from the same patient had a  
338 median pairwise SNP distance of 5 (range, 0-31) (Figure 6, Table S5). Within the same-patient  
339 group, sub-lineage CC2A, CC2B, and ST499<sup>Pas</sup>D isolates collected from the same patients were  
340 very closely related (range, 0-9 SNPs), while sub-lineage CC2C isolates tended to have more  
341 SNPs in pairwise comparisons (range, 1-31 SNPs). Higher pairwise SNP differences were  
342 observed among isolates from the same hospital, same study site and different study site isolates  
343 for all sub-lineages when compared to same patient isolates. Based on these data, we conclude  
344 that isolates belonging to CC2A, CC2B, and ST499<sup>Pas</sup> that are 5-10 SNPs apart, and CC2C  
345 isolates that are up to approximately 30 SNPs apart, likely belong to the same strain and SNP  
346 differences this small between isolates from different patients may indicate recent transmission,  
347 while SNP differences of more than 100 likely indicate infection by unrelated strains.

348 **ST499<sup>Pas</sup> as an emergent *CRAB* lineage in the US.**



349 ST499<sup>Pas</sup> was the most common non-CC2 lineage in this study, comprising 16% of all isolates.  
350 Since this lineage was not previously known to be a dominant CRAb lineage in the US, we  
351 reviewed our findings in the context of ST499<sup>Pas</sup> isolates genomes deposited in the NCBI  
352 database from a variety of locations in the US and from Tanzania (Figure S1). A group of 11  
353 closely related isolates represented an outbreak of CRAb in a Chicago-area hospital between  
354 2009 and 2012 (27). Another 14 isolates, most of which were carbapenem-resistant, were  
355 collected in Maryland in 2011 and 2012 (28). The rest of the isolates in the database were  
356 reported from Kentucky, Ohio, and Tanzania. Phylogenetic analysis of all ST499<sup>Pas</sup> genomes  
357 from SNAP and NCBI showed a diverse population, with a median pairwise SNP distance of  
358 1,386 (range, 0-7,803) over the 2.3-Mb core genome. The majority of the ST499<sup>Pas</sup> genomes in  
359 the NCBI database were identified as carbapenem-resistant in respective reports, however we  
360 were not able to identify previously known carbapenemase genes in 46% (16/35) of isolates. In  
361 contrast, all SNAP ST499<sup>Pas</sup> isolates possessed an acquired carbapenemase gene. Among the  
362 combined SNAP and NCBI ST499<sup>Pas</sup> genomes, *bla*<sub>OXA-24/40</sub> was the most common acquired  
363 carbapenemase gene, followed by *bla*<sub>OXA-23</sub> and *bla*<sub>OXA-72</sub> (27, 29, 30). ARLG6420 -RI  
364 identified in our cohort, was only found in two unrelated NCBI deposited genomes.

365

## 366 **Discussion**

367 CRAb pose a significant problem worldwide due to their high frequency of multidrug resistance  
368 and limited options for effective treatment. In 2019, the CDC Antimicrobial Resistance Threats  
369 Report listed CRAb as an urgent public health threat due to limited treatment options and also  
370 pointed to their potential to spread carbapenemase genes to non-*Acinetobacter* healthcare-  
371 associated pathogens (4). Here, we described the contemporary clinical and genome

372 epidemiology of 120 patients and associated bacterial isolates registered at four major medical  
373 centers in the US.

374 Patients infected or colonized with *CRAb* were older and were admitted from healthcare  
375 settings, such as long-term care facilities. Majority had comorbid conditions, and almost half of  
376 the patients were critically ill at the time of initial presentation. Majority of *CRAb* were isolated  
377 from respiratory and wound sources.

378 Most studies of clinical outcomes of *CRAb* infection have been derived from  
379 observational or retrospective studies, often from single hospital systems. Mortality estimates  
380 associated with *CRAb* infection in the past have been highly variable, ranging between 16% and  
381 to 76% (31). In our study, all cause 30- and 90-day mortality rates were 24% and 27%,  
382 respectively. In patients determined to have infection, both 30- and 90-day mortality was 26%.  
383 These findings underscore the idea that *CRAb* pose a threat to the most vulnerable patients and  
384 contribute to the high morbidity and mortality. Viewed another way, *CRAb* appear to colonize  
385 and infect patients who are at high risk for poor outcomes.

386 CC2 was the most prevalent *CRAb* lineage in our study, followed by ST499<sup>Pas</sup>. The two  
387 dominant lineages differed in plasmid content, with CC2 isolates having generally more  
388 plasmids than non-CC2 isolates, including ST499<sup>Pas</sup>. Additionally, different genomic regions  
389 were affected by recombination in CC2 and ST499<sup>Pas</sup>. Most notably, the CPS locus was a hot  
390 spot for recombination in CC2 isolates, indicating possible selection for diversification of this  
391 trait but also confounding strain assignments based on the Oxford ST scheme. Once these  
392 recombination events are accounted for, sub-lineages within CC2 and ST499<sup>Pas</sup> were no longer  
393 distinguishable, demonstrating the role of recombination events in their ongoing diversification.  
394 The sub-lineages within CC2 and ST499<sup>Pas</sup> differed in their geographic distribution,

395 antimicrobial susceptibilities, as well as plasmid and RI content. Overall, these data demonstrate  
396 that recombination as well as plasmid and RI content play an important role in the emergence  
397 and differentiation of *CRAb* clonal lineages and their acquisition of antimicrobial resistance  
398 determinants (32).

399         When compared to prior surveillance studies, we saw a shift in the dominant *CRAb* sub-  
400 lineages within CC2. A previous molecular epidemiologic study of *CRAb* in the US from 2008-  
401 2009 showed predominance of ST2<sup>Pas</sup>/122<sup>Ox</sup> and ST2<sup>Pas</sup>/208<sup>Ox</sup> lineages among *CRAb* isolates at  
402 six health systems across the US (6). In the present study, we did not identify any ST2<sup>Pas</sup>/122<sup>Ox</sup>  
403 isolates and relatively few ST2<sup>Pas</sup>/208<sup>Ox</sup> isolates. Instead, sub-lineage CC2C (ST2<sup>Pas</sup>/281<sup>Ox</sup>)  
404 emerged as one of the dominant lineages at three of four participating sites. This is consistent  
405 with a recent report by Adams et al. describing replacement of ST208<sup>Ox</sup> by ST281<sup>Ox</sup> in two  
406 Cleveland health systems (16). Similarly, ST281<sup>Ox</sup> was found to be the dominant sub-lineage at a  
407 Maryland hospital in 2011-2012 (28). On the other hand, the emergence of ST499<sup>Pas</sup> as another  
408 dominant lineage was unexpected. While ST499<sup>Pas</sup> isolates have been reported over the years  
409 from different US cities, it has not been considered as an emerging lineage taking a foothold in  
410 hospital systems across the country, as was identified in this study. On balance, each hospital  
411 system in our study appeared to have its own unique *CRAb* population. The *CRAb* populations  
412 within individual hospitals were similar to those in the health systems they belonged to. This is  
413 not surprising and can be explained by movement of patients and healthcare workers between  
414 hospitals and long-term care facilities within the same geographical areas. Some sub-lineages  
415 were widely distributed, like sub-lineage CC2C (ST2<sup>Pas</sup>/ST281<sup>Ox</sup>), while others were more  
416 localized, like sub-lineage CC2B (ST2<sup>Pas</sup>/ST451<sup>Ox</sup>), which was found primarily in Pittsburgh.  
417 Generally, in study sites with many *CRAb* cases, few clonal sub-lineages dominated, suggesting

418 endemicity within hospitals or associated facilities, as *CRAb* is known to survive for prolonged  
419 periods of time on environmental surfaces such as hospital beds and in sinks and other plumbing  
420 (33, 34). While our study was not designed to investigate patient-to-patient transmission, core  
421 genome SNP analyses showed that the majority of same patient, same sub-lineage isolates fell  
422 within 10 SNPs of one another, whereas isolates from different patients at the same site typically  
423 had more than 100 SNPs separating them. This finding may be useful in the interpretation of  
424 genome sequencing data of *CRAb* in the context of hospital epidemiology.

425         The antibiotic susceptibility profiles of the *CRAb* isolates we collected were distinct  
426 compared to prior surveys. While different sub-lineages had distinct profiles, we observed a  
427 general decrease in resistance to cephalosporins and aminoglycosides in our cohort compared to  
428 a prior survey, as well as an increase in non-susceptibility to ampicillin-sulbactam (6). A  
429 concerning finding was the high rate of colistin resistance. The overall colistin resistance rate in  
430 our study was 22%, with sub-lineage CC2C (ST281<sup>Ox</sup>) being the main driver with nearly 40% of  
431 isolates being resistant. This is in contrast with a recent study reporting a colistin resistance rate  
432 of 8.7% among meropenem-non-susceptible *A. baumannii* isolates collected from hospitals in  
433 North America in 2014, as well as the colistin resistance rate of 16.6% reported in a recent study  
434 from Europe (35, 36). The fact that we uncovered diverse mutations in *pmrB* and *lpxD* among  
435 the colistin-resistant isolates, and that resistant isolates were interspersed throughout the sub-  
436 lineage CC2C phylogeny, suggests that colistin resistance probably evolved *de novo* in each  
437 patient, rather than spread through transmission of a single resistant clone. It is also possible that  
438 sub-lineage CC2C (ST281<sup>Ox</sup>) is more adept at maintaining colistin resistance, which may have  
439 lead to overrepresentation of colistin-resistant isolates belonging to this sub-lineage. This finding  
440 has implications for empiric treatment options, since colistin or polymyxin B is still often the

441    mainstay of therapy, and susceptibility testing is delayed given the complexity of current testing  
442    strategies. Nonetheless, these findings highlight the need for development of new testing  
443    strategies for rapid determination of colistin susceptibility, along with alternative therapies, to  
444    minimize the risk of administering inactive therapy.

445            One novel therapy that could be useful for the treatment of *CRAB* is cefiderocol, a  
446    siderophore cephalosporin approved in 2019 after the conduct of this study. Approximately 6%  
447    of the *CRAB* isolates were found to be resistant to cefiderocol using CLSI breakpoints, which is  
448    comparable with previously reported surveillance data (35). When we used FDA established  
449    breakpoints, the resistance rate largely did not change, however, additional ten isolates were  
450    considered to be intermediate to cefiderocol. This finding, in conjunction with recent evidence of  
451    higher all-cause mortality in patients who were infected with *CRAB* and treated with cefiderocol  
452    in the CREDIBLE-CR trial (which compared cefiderocol to the best available therapy for  
453    carbapenem-resistant organisms), suggests that the role of cefiderocol in the treatment of  
454    invasive *CRAB* infections remains unclear (37). However, it might still be considered as a rescue  
455    therapy in critically ill patients, in which case susceptibility of the isolate should be confirmed  
456    (38).

457            This study had several limitations. We only included patients and isolates from four large  
458    hospital systems that were the initial participants of the SNAP cohort. These sites were largely  
459    self-selected and might not be representative of the US population as a whole. Additionally, this  
460    study was restricted in time to 12 months and was thus unable to examine changes in *CRAB*  
461    populations over time. Furthermore, the sample size was relatively small, which makes it  
462    difficult to draw clinically relevant conclusions regarding lineage-specific outcomes. We expect  
463    to address many of these limitations in future studies of the full SNAP dataset. Systematic

464 studies of *CRAb* are of paramount importance for devising strategies to prevent their  
465 dissemination and improve clinical outcomes. The full SNAP dataset will provide a robust  
466 resource for studying *CRAb* biology and associated clinical outcomes in a systematic, clinically-  
467 informed manner.

468 Overall, our findings highlight the continued importance of *CRAb* as a healthcare-  
469 associated pathogen causing high morbidity and mortality and with limited treatment options, as  
470 well as the importance of real-time surveillance and genomic epidemiology in studying their  
471 dissemination and clinical impact.

472

### 473 **Acknowledgements**

474 The research reported in this publication was supported by the National Institute of Allergy and  
475 Infectious Diseases the National Institutes of Health under Award Number R21AI135522 and in  
476 part under Award Number UM1AI104681. The content is solely the responsibility of the authors  
477 and does not necessarily represent the official views of the National Institutes of Health.

478 A.I. was supported through Physician Scientist Incubator Program at the University of Pittsburgh  
479 sponsored by the Burrows Wellcome Fund. R.A.B. was supported by the National Institutes of  
480 Health under Award Nos. R01AI100560, R01AI063517, and R01AI072219. This study was also  
481 supported in part by funds and/or facilities provided by the Cleveland Department of Veterans  
482 Affairs, Award Nos. and 1I01BX001974 to R.A.B. from the Biomedical Laboratory Research &  
483 Development Service of the VA Office of Research and Development, and the Geriatric  
484 Research Education and Clinical Center VISN 10. V.S.C. was supported by a research grant  
485 from the National Institutes of Health (U01AI124302) and, in part, by PA CURES Grant  
486 #4100085725 with the Pennsylvania Department of Health. D.V.T. was supported by a research

487 grant from the National Institutes of Health (R00EY02822). Y.D. was supported by research  
488 grants from the National Institutes of Health (R01AI104895, R21AI151362). SSR reports prior  
489 employment by bioMerieux (Aug 2019 – May 2021) and research funding from BD Diagnostics,  
490 Hologic, Diasorin, and Lifescale while employed in the department of Laboratory Medicine at  
491 Cleveland Clinic. CL was supported by a research grant from the National Institutes of Health  
492 T32GM086330. CAA was supported by NIH/NIAID grants R01- AI148342-01, R01AI134637,  
493 K24-AI121296 and P01- AI152999-01

494 We thank Shionogi for provision of materials required for susceptibility testing of cefiderocol.

495

## 496 **References**

- 497 1. Isler B, Doi Y, Bonomo RA, Paterson DL. 2019. New Treatment Options against  
498 Carbapenem-Resistant *Acinetobacter baumannii* Infections. *Antimicrob Agents*  
499 *Chemother* 63.
- 500 2. Tacconelli E. MN. 2017. Global Priority List of Antibiotic-Resistant Bacteria to Guide  
501 Research, Discovery, and Development of New Antibiotics. Geneva: World Health  
502 Organization.
- 503 3. Evans SR, Rubin D, Follmann D, Pennello G, Huskins WC, Powers JH, Schoenfeld D,  
504 Chuang-Stein C, Cosgrove SE, Fowler VG, Jr., Lautenbach E, Chambers HF. 2015.  
505 Desirability of outcome ranking (DOOR) and response adjusted for duration of antibiotic  
506 risk (RADAR). *Clin Infect Dis* 61:800-6.
- 507 4. CDC. 2019. Antibiotic Resistance Threats in the United States.  
508 <https://www.cdc.gov/drugresistance/biggest-threats.html>.

- 509 5. Hamidian M, Nigro SJ. 2019. Emergence, molecular mechanisms and global spread of  
510 carbapenem-resistant *Acinetobacter baumannii*. *Microb Genom* 5.
- 511 6. Adams-Haduch JM, Onuoha EO, Bogdanovich T, Tian GB, Marschall J, Urban CM,  
512 Spellberg BJ, Rhee D, Halstead DC, Pasculle AW, Doi Y. 2011. Molecular epidemiology  
513 of carbapenem-nonsusceptible *Acinetobacter baumannii* in the United States. *J Clin*  
514 *Microbiol* 49:3849-54.
- 515 7. Mustapha MM, Li B, Pacey MP, Mettus RT, McElheny CL, Marshall CW, Ernst RK,  
516 Cooper VS, Doi Y. 2018. Phylogenomics of colistin-susceptible and resistant XDR  
517 *Acinetobacter baumannii*. *J Antimicrob Chemother* 73:2952-2959.
- 518 8. Henderson H, Luterbach CL, Cober E, Richter SS, Salata RA, Kalayjian RC, Watkins  
519 RR, Doi Y, Kaye KS, Evans S, Fowler VG, Bonomo RA, Harris A, Napravnik S, Van  
520 Duin D. 2020. The Pitt Bacteremia Score Predicts Mortality in Nonbacteremic Infections.  
521 *Clin Infect Dis* 70:1826-1833.
- 522 9. Charlson ME, Pompei P, Ales KL, MacKenzie CR. 1987. A new method of classifying  
523 prognostic comorbidity in longitudinal studies: development and validation. *J Chronic*  
524 *Dis* 40:373-83.
- 525 10. van Duin D, Arias CA, Komarow L, Chen L, Hanson BM, Weston G, Cober E, Garner  
526 OB, Jacob JT, Satlin MJ, Fries BC, Garcia-Diaz J, Doi Y, Dhar S, Kaye KS, Earley M,  
527 Hujer AM, Hujer KM, Domitrovic TN, Shropshire WC, Dinh A, Manca C, Luterbach  
528 CL, Wang M, Paterson DL, Banerjee R, Patel R, Evans S, Hill C, Arias R, Chambers HF,  
529 Fowler VG, Jr., Kreiswirth BN, Bonomo RA, Multi-Drug Resistant Organism Network I.  
530 2020. Molecular and clinical epidemiology of carbapenem-resistant *Enterobacterales* in  
531 the USA (CRACKLE-2): a prospective cohort study. *Lancet Infect Dis* 20:731-741.



- 532 11. Mandell LA, Wunderink RG, Anzueto A, Bartlett JG, Campbell GD, Dean NC, Dowell  
533 SF, File TM, Jr., Musher DM, Niederman MS, Torres A, Whitney CG, Infectious  
534 Diseases Society of A, American Thoracic S. 2007. Infectious Diseases Society of  
535 America/American Thoracic Society consensus guidelines on the management of  
536 community-acquired pneumonia in adults. *Clin Infect Dis* 44 Suppl 2:S27-72.
- 537 12. American Thoracic S, Infectious Diseases Society of A. 2005. Guidelines for the  
538 management of adults with hospital-acquired, ventilator-associated, and healthcare-  
539 associated pneumonia. *Am J Respir Crit Care Med* 171:388-416.
- 540 13. Zarkotou O, Pournaras S, Altouvas G, Pitiriga V, Tziraki M, Mamali V, Themeli-  
541 Digalaki K, Tsakris A. 2012. Comparative evaluation of tigecycline susceptibility testing  
542 methods for expanded-spectrum cephalosporin- and carbapenem-resistant gram-negative  
543 pathogens. *J Clin Microbiol* 50:3747-50.
- 544 14. Salgado-Camargo AD, Castro-Jaimes S, Gutierrez-Rios RM, Lozano LF, Altamirano-  
545 Pacheco L, Silva-Sanchez J, Perez-Oseguera A, Volkow P, Castillo-Ramirez S, Cevallos  
546 MA. 2020. Structure and Evolution of *Acinetobacter baumannii* Plasmids. *Front*  
547 *Microbiol* 11:1283.
- 548 15. Pagano M, Martins AF, Barth AL. 2016. Mobile genetic elements related to carbapenem  
549 resistance in *Acinetobacter baumannii*. *Braz J Microbiol* 47:785-792.
- 550 16. Adams MD, Wright MS, Karichu JK, Venepally P, Fouts DE, Chan AP, Richter SS,  
551 Jacobs MR, Bonomo RA. 2019. Rapid Replacement of *Acinetobacter baumannii* Strains  
552 Accompanied by Changes in Lipooligosaccharide Loci and Resistance Gene Repertoire.  
553 *MBio* 10.

- 554 17. Ou HY, Kuang SN, He X, Molgora BM, Ewing PJ, Deng Z, Osby M, Chen W, Xu HH.  
555 2015. Complete genome sequence of hypervirulent and outbreak-associated  
556 *Acinetobacter baumannii* strain LAC-4: epidemiology, resistance genetic determinants  
557 and potential virulence factors. *Sci Rep* 5:8643.
- 558 18. Jin W, Wachino J, Kimura K, Yamada K, Arakawa Y. 2015. New plasmid-mediated  
559 aminoglycoside 6'-N-acetyltransferase, AAC(6')-Ia<sub>n</sub>, and ESBL, TLA-3, from a *Serratia*  
560 *marcescens* clinical isolate. *J Antimicrob Chemother* 70:1331-7.
- 561 19. Montealegre MC, Maya JJ, Correa A, Espinal P, Mojica MF, Ruiz SJ, Rosso F, Vila J,  
562 Quinn JP, Villegas MV. 2012. First identification of OXA-72 carbapenemase from  
563 *Acinetobacter pittii* in Colombia. *Antimicrob Agents Chemother* 56:3996-8.
- 564 20. Cayo R, Merino M, Ruiz Del Castillo B, Cano ME, Calvo J, Bou G, Martinez-Martinez  
565 L. 2014. OXA-207, a novel OXA-24 variant with reduced catalytic efficiency against  
566 carbapenems in *Acinetobacter pittii* from Spain. *Antimicrob Agents Chemother* 58:4944-  
567 8.
- 568 21. Hujer AM, Higgins PG, Rudin SD, Buser GL, Marshall SH, Xanthopoulou K, Seifert H,  
569 Rojas LJ, Domitrovic TN, Cassidy PM, Cunningham MC, Vega R, Furuno JP, Pfeiffer  
570 CD, Beldavs ZG, Wright MS, Jacobs MR, Adams MD, Bonomo RA. 2017. Nosocomial  
571 Outbreak of Extensively Drug-Resistant *Acinetobacter baumannii* Isolates Containing  
572 *bla*<sub>OXA-237</sub> Carried on a Plasmid. *Antimicrob Agents Chemother* 61.
- 573 22. Zander E, Chmielarczyk A, Heczko P, Seifert H, Higgins PG. 2013. Conversion of OXA-  
574 66 into OXA-82 in clinical *Acinetobacter baumannii* isolates and association with altered  
575 carbapenem susceptibility. *J Antimicrob Chemother* 68:308-11.

- 576 23. Liu YY, Wang Y, Walsh TR, Yi LX, Zhang R, Spencer J, Doi Y, Tian G, Dong B,  
577 Huang X, Yu LF, Gu D, Ren H, Chen X, Lv L, He D, Zhou H, Liang Z, Liu JH, Shen J.  
578 2016. Emergence of plasmid-mediated colistin resistance mechanism MCR-1 in animals  
579 and human beings in China: a microbiological and molecular biological study. *Lancet*  
580 *Infect Dis* 16:161-8.
- 581 24. Olaitan AO, Morand S, Rolain JM. 2014. Mechanisms of polymyxin resistance: acquired  
582 and intrinsic resistance in bacteria. *Front Microbiol* 5:643.
- 583 25. Adams MD, Nickel GC, Bajaksouzian S, Lavender H, Murthy AR, Jacobs MR, Bonomo  
584 RA. 2009. Resistance to colistin in *Acinetobacter baumannii* associated with mutations in  
585 the PmrAB two-component system. *Antimicrob Agents Chemother* 53:3628-34.
- 586 26. Hamidian M, Nigro SJ, Hall RM. 2017. Problems with the Oxford Multilocus Sequence  
587 Typing Scheme for *Acinetobacter baumannii*: Do Sequence Type 92 (ST92) and ST109  
588 Exist? *J Clin Microbiol* 55:2287-2289.
- 589 27. Fitzpatrick MA, Ozer EA, Hauser AR. 2016. Utility of whole-genome sequencing in  
590 characterizing *Acinetobacter* epidemiology and analyzing hospital outbreaks. *J Clin*  
591 *Microbiol* 54:593-612.
- 592 28. Wallace L, Daugherty SC, Nagaraj S, Johnson JK, Harris AD, Rasko DA. 2016. Use of  
593 Comparative Genomics To Characterize the Diversity of *Acinetobacter baumannii*  
594 Surveillance Isolates in a Health Care Institution. *Antimicrob Agents Chemother*  
595 60:5933-41.
- 596 29. Ozer EA, Fitzpatrick MA, Hauser AR. 2014. Draft Genome Sequence of *Acinetobacter*  
597 *baumannii* Strain ABBL099, a Multidrug-Resistant Clinical Outbreak Isolate with a  
598 Novel Multilocus Sequence Type. *Genome Announc* 2.

- 599 30. Kumburu HH, Sonda T, van Zwetselaar M, Leekitcharoenphon P, Lukjancenکو O,  
600 Mmbaga BT, Alifrangis M, Lund O, Aarestrup FM, Kibiki GS. 2019. Using WGS to  
601 identify antibiotic resistance genes and predict antimicrobial resistance phenotypes in  
602 MDR *Acinetobacter baumannii* in Tanzania. J Antimicrob Chemother 74:1484-1493.
- 603 31. Lemos EV, de la Hoz FP, Einarson TR, McGhan WF, Quevedo E, Castaneda C, Kawai  
604 K. 2014. Carbapenem resistance and mortality in patients with *Acinetobacter baumannii*  
605 infection: systematic review and meta-analysis. Clin Microbiol Infect 20:416-23.
- 606 32. Snitkin ES, Zelazny AM, Montero CI, Stock F, Mijares L, Program NCS, Murray PR,  
607 Segre JA. 2011. Genome-wide recombination drives diversification of epidemic strains of  
608 *Acinetobacter baumannii*. Proc Natl Acad Sci U S A 108:13758-63.
- 609 33. Shimose LA, Masuda E, Sfeir M, Berbel Caban A, Bueno MX, dePascale D, Spychala  
610 CN, Cleary T, Namias N, Kett DH, Doi Y, Munoz-Price LS. 2016. Carbapenem-  
611 Resistant *Acinetobacter baumannii*: Concomitant Contamination of Air and  
612 Environmental Surfaces. Infect Control Hosp Epidemiol 37:777-81.
- 613 34. Kizny Gordon AE, Mathers AJ, Cheong EYL, Gottlieb T, Kotay S, Walker AS, Peto  
614 TEA, Crook DW, Stoesser N. 2017. The Hospital Water Environment as a Reservoir for  
615 Carbapenem-Resistant Organisms Causing Hospital-Acquired Infections-A Systematic  
616 Review of the Literature. Clin Infect Dis 64:1435-1444.
- 617 35. Karlowsky JA, Hackel MA, Tsuji M, Yamano Y, Echols R, Sahm DF. 2019. In Vitro  
618 Activity of Cefiderocol, a Siderophore Cephalosporin, Against Gram-Negative Bacilli  
619 Isolated by Clinical Laboratories in North America and Europe in 2015-2016: SIDERO-  
620 WT-2015. Int J Antimicrob Agents 53:456-466.

- 621 36. Hackel MA, Tsuji M, Yamano Y, Echols R, Karlowsky JA, Sahm DF. 2017. In Vitro  
622 Activity of the Siderophore Cephalosporin, Cefiderocol, against a Recent Collection of  
623 Clinically Relevant Gram-Negative Bacilli from North America and Europe, Including  
624 Carbapenem-Nonsusceptible Isolates (SIDERO-WT-2014 Study). *Antimicrob Agents*  
625 *Chemother* 61.
- 626 37. Bassetti M, Echols R, Matsunaga Y, Ariyasu M, Doi Y, Ferrer R, Lodise TP, Naas T,  
627 Niki Y, Paterson DL, Portsmouth S, Torre-Cisneros J, Toyozumi K, Wunderink RG,  
628 Nagata TD. 2020. Efficacy and safety of cefiderocol or best available therapy for the  
629 treatment of serious infections caused by carbapenem-resistant Gram-negative bacteria  
630 (CREDIBLE-CR): a randomised, open-label, multicentre, pathogen-focused, descriptive,  
631 phase 3 trial. *Lancet Infect Dis* doi:10.1016/S1473-3099(20)30796-9.
- 632 38. Falcone M, Tiseo G, Nicastro M, Leonildi A, Vecchione A, Casella C, Forfori F,  
633 Malacarne P, Guarracino F, Barnini S, Menichetti F. 2020. Cefiderocol as rescue therapy  
634 for *Acinetobacter baumannii* and other carbapenem-resistant Gram-Negative infections in  
635 ICU patients. *Clin Infect Dis* doi:10.1093/cid/ciaa1410.

636

**Table 1. Clinical characteristics and outcomes following collection of the first CRAB isolate from each patient.**

| Characteristics                       |                                             | Total (n120) |
|---------------------------------------|---------------------------------------------|--------------|
| <b>Age at culture</b>                 | Median (IQR)                                | 61 (51, 70)  |
| <b>Gender</b>                         | Male                                        | 72 (60%)     |
|                                       | Female                                      | 48 (40%)     |
| <b>Race</b>                           | White                                       | 74 (62%)     |
|                                       | Black                                       | 33 (28%)     |
|                                       | Other                                       | 7 (6%)       |
|                                       | Unknown                                     | 6 (5%)       |
| <b>CCI*</b>                           | Median (IQR)                                | 3 (1, 4)     |
| <b>Pitt bacteremia score**</b>        | Median (IQR)                                | 3 (2, 6)     |
| <b>Admitted from</b>                  | Home                                        | 37 (31%)     |
|                                       | Transfer from other hospital                | 21 (18%)     |
|                                       | Long term care                              | 49 (41%)     |
|                                       | Long term acute care (LTAC)                 | 13 (11%)     |
| <b>Study site</b>                     | Cleveland Clinic Foundation                 | 66 (55%)     |
|                                       | University of North Carolina at Chapel Hill | 3 (3%)       |
|                                       | University of Pittsburgh Medical Center     | 27 (23%)     |
|                                       | University of Texas Hospitals               | 24 (20%)     |
| <b>Culture</b>                        | Respiratory infection                       | 33 (28%)     |
|                                       | Respiratory colonization                    | 23 (19%)     |
|                                       | Wound infection                             | 20 (17%)     |
|                                       | Wound colonization                          | 23 (19%)     |
|                                       | Blood infection                             | 9 (8%)       |
|                                       | Urine infection                             | 3 (3%)       |
|                                       | Urine colonization                          | 6 (5%)       |
|                                       | Other colonization                          | 2 (2%)       |
|                                       | Non-wound abdominal infection               | 1 (1%)       |
| <b>DOOR categories at 30 days ***</b> | Alive without events                        | 53 (44%)     |
|                                       | Alive with one event                        | 23 (19%)     |
|                                       | Alive with two or three events              | 15 (13%)     |
|                                       | Dead                                        | 29 (24%)     |
| <b>DOOR events at 30 days</b>         | Dead or discharged to hospice               | 24 (20%)     |
|                                       | No clinical response                        | 41 (34%)     |
|                                       | Renal failure                               | 8 (7%)       |
|                                       | <i>C. difficile</i>                         | 3 (3%)       |

|                                                  |         |          |
|--------------------------------------------------|---------|----------|
| <b>Mortality</b>                                 | 30 days | 29 (24%) |
|                                                  | 90 days | 32 (27%) |
| <b>Mortality among subjects with infection</b>   | 30 days | 17 (26%) |
|                                                  | 90 days | 17 (26%) |
| <b>Readmission</b>                               | 90 days | 51 (54%) |
| <b>Readmission among subjects with infection</b> | 90 days | 25 (38%) |

Data are n (%) or median (IQR).

\* Charlson comorbidity index (CCI) is a chronic comorbidity score with a range from 0 to 37, with higher scores indicating more comorbid conditions present. A patient with a score of 3 could have three level 1 comorbid conditions (e.g., dementia, chronic pulmonary disease, and congestive heart failure), one level 1 (e.g., dementia) and one level 2 comorbid condition (e.g., leukemia), or one level 3 condition (moderate or severe liver disease).

\*\* Pitt bacteremia score is an acute severity of illness score. Higher scores indicate more severe illness. A patient with a score of 3 would have one level 1 marker (e.g., disoriented mental status) and one level 2 marker of acute illness (e.g., hypotension).

\*\*\* DOOR, desirability of outcome ranking. DOOR analysis components are defined in the methods section.

**Table 2.** Geographic distribution of CRAB isolates by study site.

| <b>Sub-lineages</b>        | <b>Total (n=115)</b> | <b>Cleveland (n=66)</b> | <b>Pittsburgh (n=25)</b> | <b>Houston (n=21)</b> | <b>Chapel Hill (n=3)</b> |
|----------------------------|----------------------|-------------------------|--------------------------|-----------------------|--------------------------|
| <b>CC2A</b>                | 13 (11%)             | 7 (11%)                 | None                     | 6 (29%)               | None                     |
| <b>CC2B</b>                | 15 (13%)             | 1 (2%)                  | 13 (52%)                 | None                  | 1 (33%)                  |
| <b>CC2C</b>                | 60 (52%)             | 46 (70%)                | 9 (36%)                  | 4 (19%)               | 1 (33%)                  |
| <b>ST499<sup>Pas</sup></b> | 18 (16%)             | 11 (17%)                | None                     | 7 (33%)               | None                     |
| <b>Other ST</b>            | 9 (8%)               | 1 (2%)                  | 3 (12%)                  | 4 (19%)               | 1 (33%)                  |

**Table 3.** Culture source distribution of CRAb isolates.

| <b>Sub-lineages</b>  | <b>Total<br/>(n=115)</b> | <b>Respiratory<br/>(n=53)</b> | <b>Wound<br/>(n=40)</b> | <b>Blood<br/>(n=8)</b> | <b>Urine<br/>(n=8)</b> | <b>Other<br/>(n=5)</b> | <b>N/A*<br/>(n=1)</b> |
|----------------------|--------------------------|-------------------------------|-------------------------|------------------------|------------------------|------------------------|-----------------------|
| CC2A                 | 13 (11%)                 | 5 (38%)                       | 6 (46%)                 | 0 (0%)                 | 1 (8%)                 | 1 (8%)                 | None                  |
| CC2B                 | 15 (13%)                 | 10 (67%)                      | 0 (0%)                  | 2 (13%)                | 1 (7%)                 | 2 (13%)                | None                  |
| CC2C                 | 60 (52%)                 | 27 (45%)                      | 25 (42%)                | 2 (3%)                 | 3 (5%)                 | 2 (5%)                 | 1 (2%)                |
| ST499 <sup>Pas</sup> | 18 (16%)                 | 6 (33%)                       | 7 (39%)                 | 3 (16%)                | 2 (11%)                | 0 (11%)                | None                  |
| Other ST             | 9 (8%)                   | 5 (56%)                       | 2 (22%)                 | 1 (11%)                | 1 (11%)                | 0                      | None                  |

\*N/A, not available



**Figure 1. Core genome phylogeny of 115 CRAb isolates from four medical centers in the US.** The first isolate sampled from each patient was included, and the mid-point rooted phylogeny was constructed from single nucleotide polymorphisms (SNPs) detected in the core genome of all isolates (2.6 Mb core genome length), using RAxML. The phylogeny is annotated based on Oxford ST and study center of isolation. Branches are shaded by lineages and sub-lineages described in the text. Nodes supported by bootstrap values of 100 are marked with red dots. NF, Not found; R, resistant; I, intermediate. An interactive version of this figure is available online at <http://arlg.med.unc.edu/crackle/>.

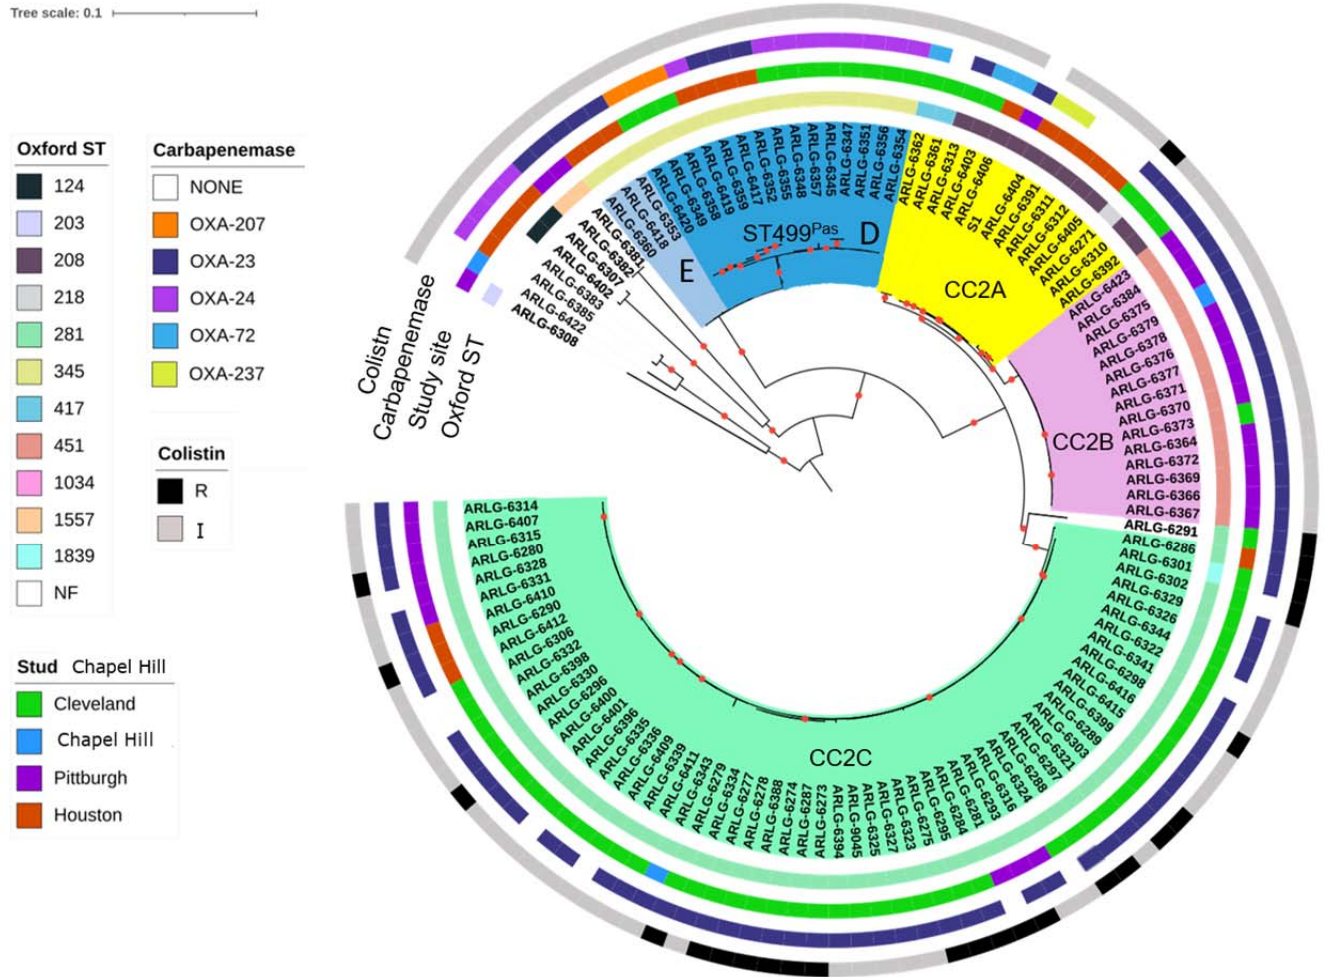



**Figure 3. CRAB phylogenetic tree from Figure 1 shown with plasmid content, genomic resistance islands (AbGRI), and antibiotic resistance genes. Plasmids were identified by long-read sequencing and *repA* gene sequence presence. Presence of genetic elements is notated with color boxes; absence is shown with white boxes. Plasmid and  $\beta$ -lactamase gene presence is shown with black boxes. AbGRI presence is shown with grey boxes. Resistance gene presence is shown with colored boxes: blue, aminoglycoside resistance; yellow, tetracycline resistance; purple, sulfonamide resistance; turquoise, chloramphenicol resistance; green, macrolide resistance; red, rifampin resistance.**

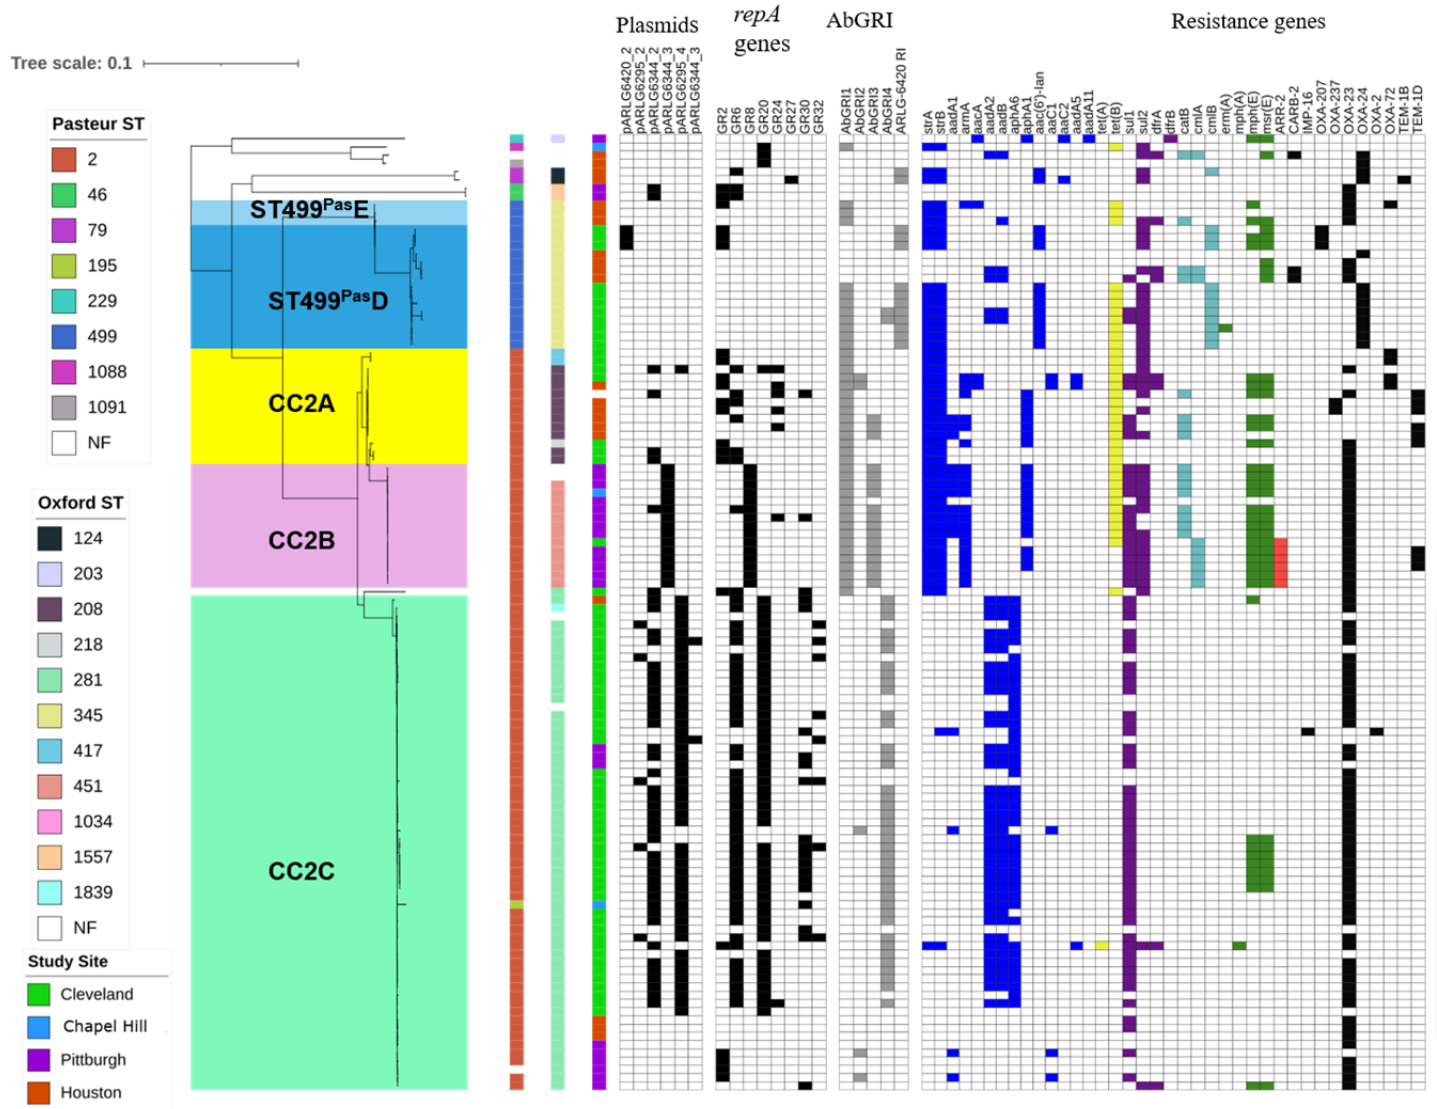

#### Figure 4. Tn6250-like resistance island identified in ST499<sup>Pas</sup> and ST79<sup>Pas</sup> isolates.

Nomenclature and labeling match the original publication of LAC-4 genome for comparison. Direction of transcription of genes is shown by arrows. Dark arrows denote transposase genes. Gray arrows denote antimicrobial resistance gens. Striped arrows and open arrows denote genes involved in conjugation and genes with unknown function, respectively.

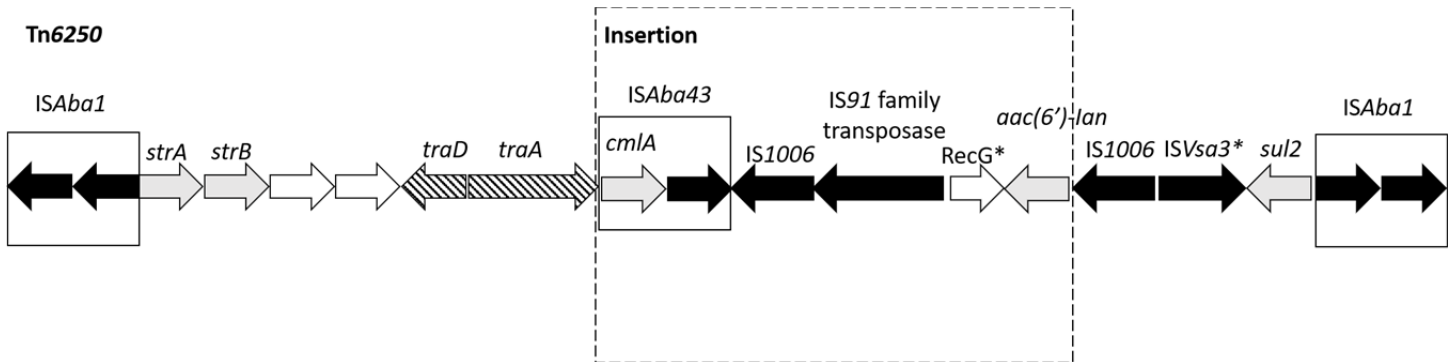

**Figure 5. ClonalFrameML analysis of recombination in *CRAb* lineages CC2 (A) and ST499<sup>Pas</sup> (B).** White vertical bars represent nucleotide substitutions along each branch of the phylogenetic tree. Dark blue horizontal bars indicate putative recombination events. Major CC2 lineages are identified by blue brackets. Recombination hotspots and are identified with black rectangles. The S1 genome was used as a reference for the CC2 lineage, while the ARLG-6345 closed genome was used for the ST499<sup>Pas</sup> lineage. CPS, capsular polysachride; MGE, mobile genetic element.

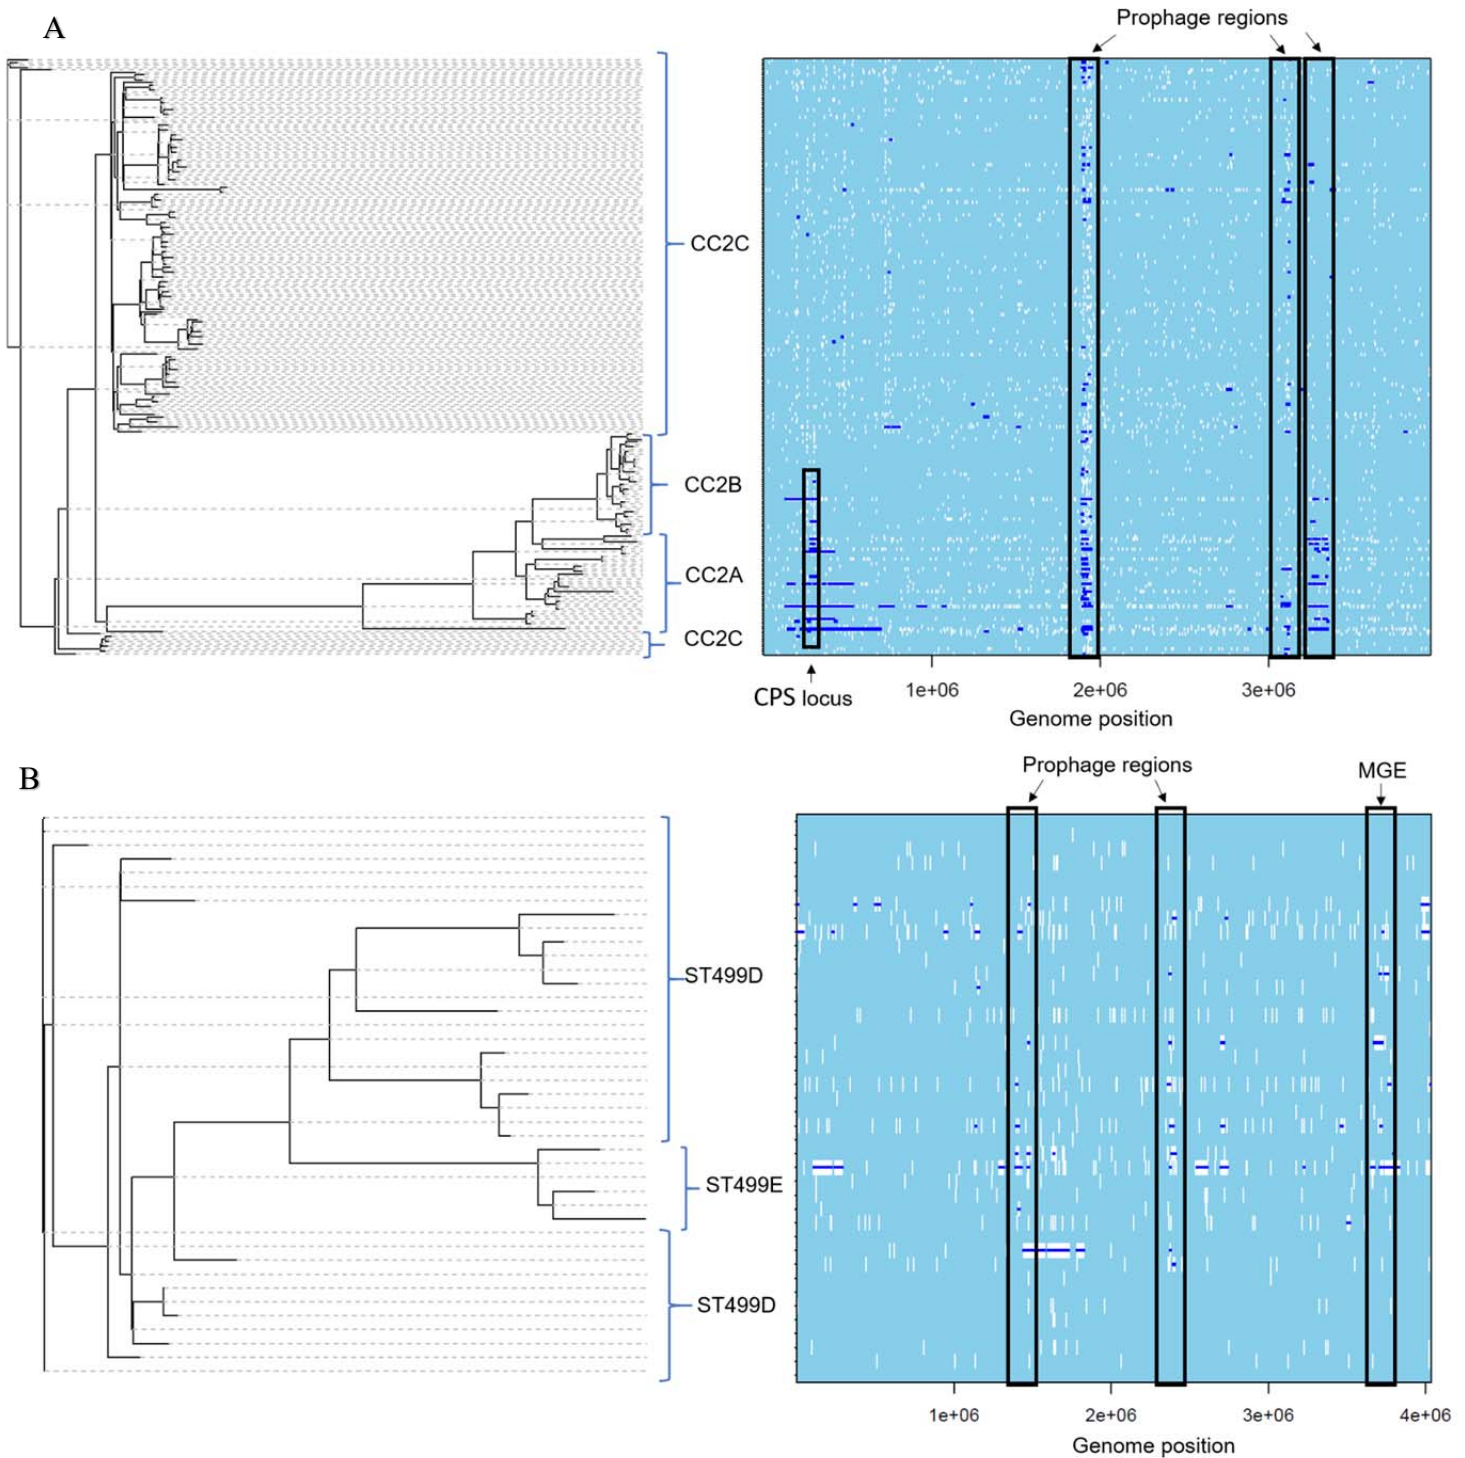

**Figure 6. Pairwise core genome SNP distance comparisons between CRAB isolates of the same sub-lineage.** A total of 150 isolates from 120 patients were included, and comparisons are color-coded by sub-lineage. Box plots indicate median (horizontal line), interquartile range (box edges), and 1.5 x interquartile range (whiskers) for each group. The dashed horizontal line marks a SNP distance of 31, which corresponds to the maximum pairwise SNP difference observed between isolates sampled from the same patient.

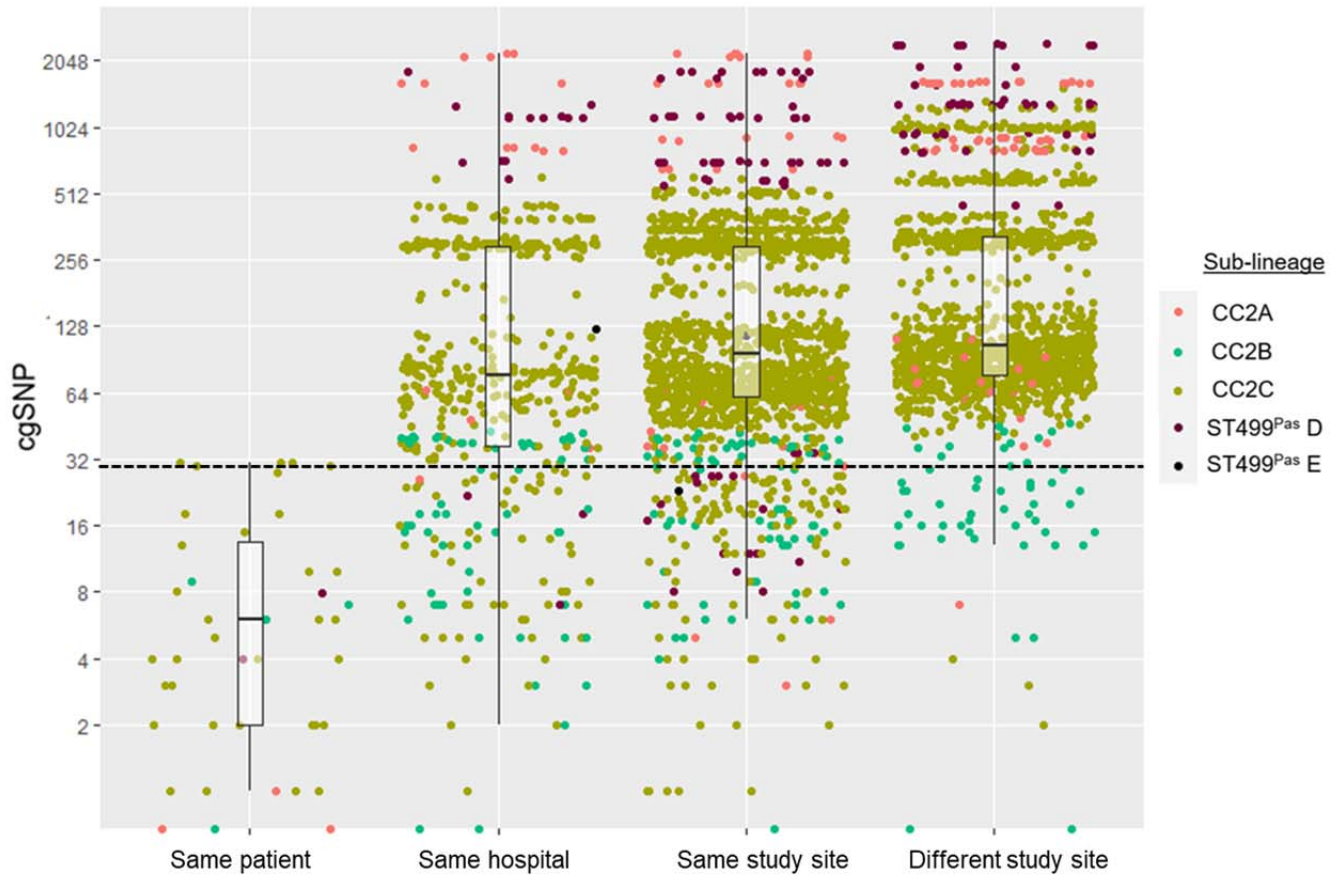

Source: http://biorxiv.org/content/10.1101/2021.09.21.461323v1.full.pdf
